# Supplementary material for: Efficient electron-promoted desorption of benzene from water ice surfaces
Source: Royal Society of Chemistry journal article supplement (doi:10.1039/c5cp06537b), 2016-01-01
Supplement: c5cp06537b1.pdf [file c5cp06537b1.pdf]

## Electronic Supplementary Information (ESI):

### Efficient Electron-promoted Desorption of Benzene from Water Ice Surfaces<sup>†</sup>

Demian Marchione<sup>\*a</sup>, John D. Thrower<sup>b</sup>, and Martin R. S. McCoustra<sup>a</sup>

#### 1 RAIR spectra of C<sub>6</sub>H<sub>6</sub> on c-ASW

Temperature programmed desorption (TPD) data, reported in a previous work,<sup>1</sup> suggest that benzene (C<sub>6</sub>H<sub>6</sub>) is  $\pi$ -hydrogen bonded to the water (H<sub>2</sub>O) ice interface in the sub-monolayer regime. Reflection-absorption infrared (RAIR) spectra for similar coverages support this interpretation with some evidence of small shifts in peak position of the aromatic C-C stretch from that of bulk C<sub>6</sub>H<sub>6</sub>.<sup>2</sup> **Figure 1** shows the evolution of the aromatic ring normal mode as the exposure of C<sub>6</sub>H<sub>6</sub> on the icy film is increased from the sub-monolayer regime (1 L) to the bulk (20 L). This vibrational fre-

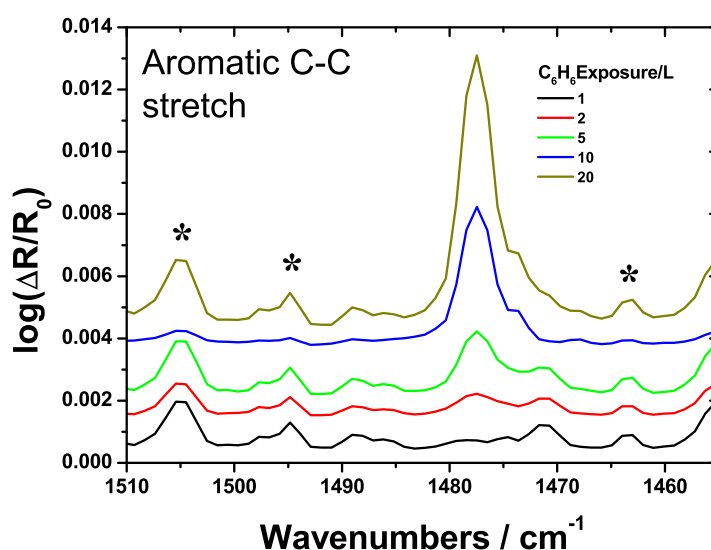

**Figure 1** RAIR spectra for 1-20 L of C<sub>6</sub>H<sub>6</sub> deposited on a thick H<sub>2</sub>O film on an amorphous SiO<sub>2</sub> substrate. H<sub>2</sub>O bands have been removed as part of the baseline correction. The features indicated by \* are attributed to gas phase H<sub>2</sub>O vapour in the beam path outside the UHV chamber.

quency appears to be sensitive enough to probe the change in the intermolecular interaction when

<sup>\*a</sup>Institute of Chemical Sciences, Heriot-Watt University, EH14 4AS, Edinburgh, UK; E-mail: dm290@hw.ac.uk

<sup>b</sup>Westfälische Wilhelms-Universität Münster, Münster, Germany; E-mail: john.thrower@uni-muenster.de

<sup>a</sup>Institute of Chemical Sciences, Heriot-Watt University, EH14 4AS, Edinburgh, UK; E-mail: mrsml@hw.ac.uk

switching between the two regimes. Thus, the observed shift from  $1474\text{ cm}^{-1}$  to  $1477\text{ cm}^{-1}$  is consistent with donation of  $\pi$ -electron density to a electrophilic centre (dangling OH).

## 2 CASINO Calculations

Monte Carlo simulations were performed to determine the electron penetration depth in pure  $\text{C}_6\text{H}_6$  and compact amorphous solid water (c-ASW) films using version 2.48 of the CASINO code.<sup>3,4</sup> The incident beam was set at  $60^\circ$ , over an area of  $1\text{ mm}^2$ , consistently with the experimental conditions (e.g. electron energy), while the average thickness of the films was estimated for each exposure as described in the article corresponding to this ESI (**Equation 1**). The ionisation coefficient<sup>5</sup> and molecular density<sup>6</sup> of  $\text{C}_6\text{H}_6$  are 6.0 and  $8.57 \times 10^{21}\text{ molecule cm}^{-3}$  respectively. For c-ASW the analogous values<sup>7,8</sup> of 1.1 and  $2.91 \times 10^{22}\text{ molecule cm}^{-3}$  were employed for the simulations.

**Figure 2** displays the penetration depth of 250 eV electrons in a pure thick  $\text{C}_6\text{H}_6$  film (200 L,  $\sim 7\text{ nm}$ ), reported in black. The arrow and the red curve highlight the thickness estimated for 50 L

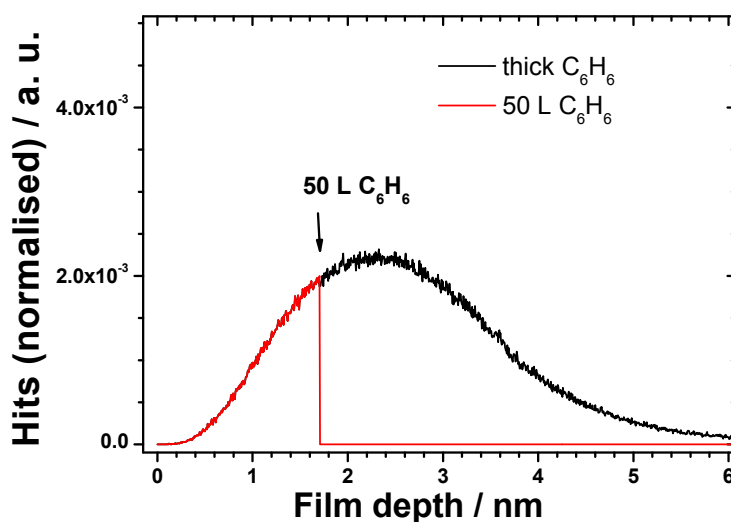

**Figure 2** Normalised distribution of the electrons as a function of the penetration depth during the irradiation of 200 L (7 nm) of  $\text{C}_6\text{H}_6$  film. This curve (in black) was obtained for 250 eV electrons. The estimated average thickness of 50 L of  $\text{C}_6\text{H}_6$  is highlighted in red. For all the exposures  $< 50\text{ L}$  the incident beam is transmitted, almost unchanged, to the ASW underlayer.

(1.7 nm) of  $\text{C}_6\text{H}_6$ . Therefore, for all the exposures lower than 50 L, most of the electrons will pass through the entire overlayer of  $\text{C}_6\text{H}_6$  reaching the ASW substrate, while they are stopped inside the  $\text{C}_6\text{H}_6$  bulk for a 200 L dose. It can be concluded that for the experiments reported in section 3.2 of the article, where 5 L of  $\text{C}_6\text{H}_6$  are deposited on top of the  $\text{H}_2\text{O}$  ice, any change in the flux of the incident beam reaching the  $\text{H}_2\text{O}$  layer due to the overlayer is negligible. This justifies the choice

of focusing on pure c-ASW ices for additional simulations.

The thinnest film employed in the experiments is a binary layered ice with 5 L of  $C_6H_6$  and 70 L (7.7 nm) of c-ASW irradiated with 250 eV electrons. The results displayed in **Figure 3** show that the maximum of the distribution peaks around 3 nm and that almost all the electrons ( $\sim 85\%$ ) are stopped within the top 5 nm for a pure c-ASW film. An almost vanishing tail persists until 10 nm

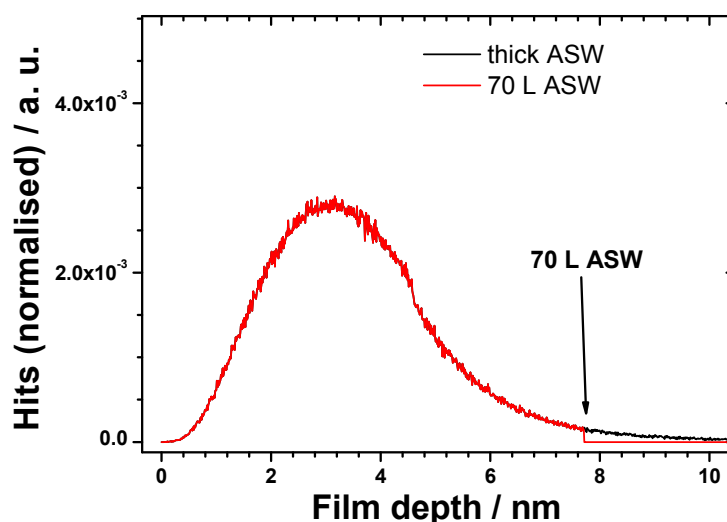

**Figure 3** Normalised distribution of the electrons as a function of the penetration depth during the irradiation of 100 L (11 nm) of c-ASW. This curve (in black) was obtained for 250 eV electrons. The estimated average thickness of 70 L of  $H_2O$  is highlighted in red. For all the exposures  $> 70$  L the incident beam is completely stopped by the c-ASW ice, while for a 70 L dose only the 2% of the primary electrons can pass through.

where the curve decays to zero, but only 2% of the electrons is transmitted through the ASW ice for a 70 L dose. In all the other cases, the systems investigated have an overall larger thickness than the calculated electron maximum penetration depth.

It can be argued that the results reported in *section 3.1* were obtained following the irradiation of ices with 300 eV electrons and, hence the penetration depth can be larger than for 250 eV electrons. **Figure 4** displays the distribution of the primary 100 - 350 eV electrons as a function of the c-ASW thickness. The maximum depth increases with electron energy, and it is noticeable that for 300 eV and 350 eV the curves decay to zero at higher lengths ( $\sim 14$  nm). However, this depth is still smaller than the average thickness estimated for the 150 L (16.5 nm) of ASW used.

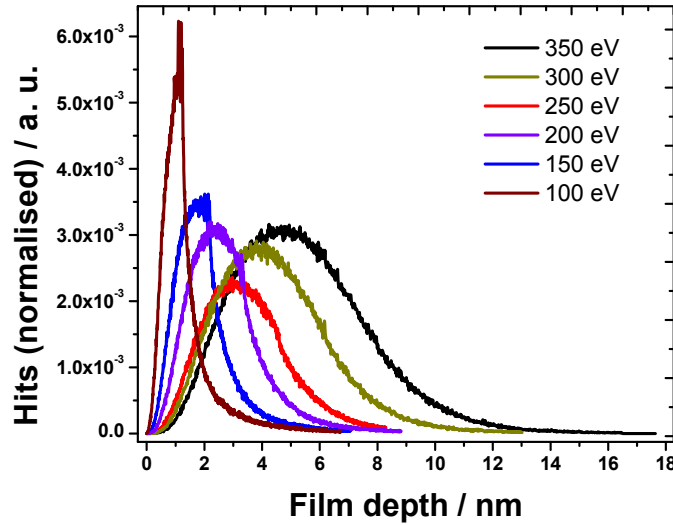

**Figure 4** Normalised distributions of the electrons as a function of the penetration depth during the irradiation of 200 L (22 nm) of c-ASW. These curves were obtained for different electron energies in the 100 eV - 350 eV range. For the 250 eV (in red) and 300 eV (in dark yellow) distributions all the electrons are stopped within the top 5 to 10 nm.

### 3 SRIM Calculations

The reported irradiation experiments can be related to the secondary electron track that forms within the icy mantles that coat interstellar dust grains as a result of impinging cosmic rays (mainly protons). Therefore, in order to aid the discussion of the data and to make considerations in an astrophysical context, the SRIM code<sup>9,10</sup> allowed us to quantify the energy deposited by a single  $H^+$  ion as a function of the initial ion energy (10 keV - 100 MeV). The  $H_2O$  solid model that was used is consistent with the CASINO calculations assuming the same molecular density. The output was then used to estimate how many secondary electrons are generated in a pure ASW film during  $H^+$  ion bombardment under typical ISM conditions.

For an incident  $H^+$  flux (10 keV - 100 MeV) all the energy is deposited through scattering with the electron density within the target molecular solid, while the energy lost by the primary ions because of the nuclear scattering is several orders of magnitude lower, as **Figure 5** clearly displays. The energy deposited in the film associated with all inelastic electronic events in  $1 \mu m$  is  $20 \text{ keV } \mu m^{-1}$ . This, divided by the amount of energy transferred per ionisation event ( $22 \text{ eV}^{11,12}$ ), and taking into account a penetration depth of 5 nm, gives the secondary electron yield of 4.5 electrons per incident proton. This yields a secondary electron flux ( $F_{e^-}$ ) in c-ASW of 4.5 electrons  $cm^{-2} s^{-1}$  for  $1 \text{ cm}^{-2} s^{-1}$  1 MeV  $H^+$  incident ions. The value can be used in **Equation 6** in order to estimate the EPD rate constant.

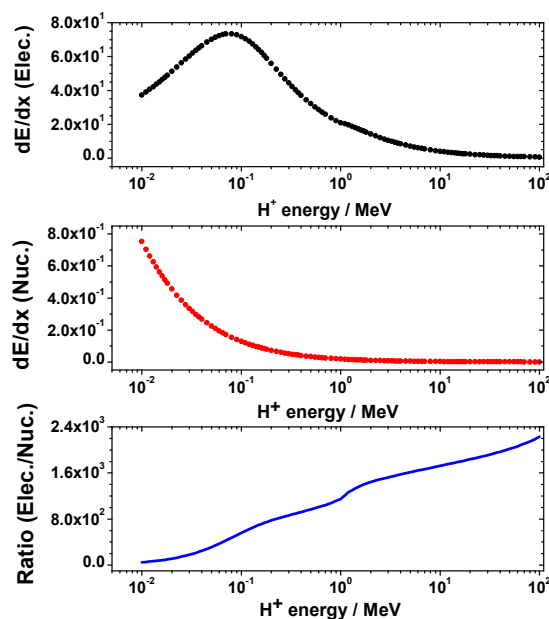

**Figure 5** The upper and central plot show the calculated energy deposited in c-ASW due to electron and nuclear scattering respectively per unit of distance ( $\mu\text{m}$ ) travelled by the projectile particle. The latter is a positively charged ion ( $H^+$ ) having energy between 10 keV and 100 MeV. The plot at the bottom displays the ratio between the energy deposited in the ice by the two inelastic scattering events showing the predominance of electron scattering in the energy range of interest for cosmic rays.

## References

- [1] J. D. Thrower, M. P. Collings, F. J. M. Rutten and M. R. S. McCoustra, *J. Chem. Phys.*, 2009, **131**, 244711.
- [2] J. D. Thrower, *PhD thesis*, Heriot-Watt University, 2009.
- [3] *Theory of Condensed Matter Group Cambridge, CASINO V 2.48*, <http://www.gel.usherbrooke.ca/casino/What.html>, 2014.
- [4] P. Hovington, D. Drouin and R. Gauvin, *Scanning*, 1997, **19**, 1–14.
- [5] G. D. Waddill and L. L. Kesmodel, *Phys. Rev. B*, 1985, **31**, 4940–4946.
- [6] C. J. Craven, P. D. Hatton, C. J. Howard and G. S. Pawley, *J. Chem. Phys.*, 1993, **98**, 8236–8243.
- [7] R. L. Summers, *Empirical observations on the sensitivity of hot cathode ionization type vacuum gauges*, National Aeronautics and Space Administration, Washington, D. C., 1969.
- [8] G. A. Kimmel, Z. Dohnálek, K. P. Stevenson, R. S. Smith and B. D. Kay, *J. Chem. Phys.*, 2001, **114**, 5295–5303.
- [9] J. F. Ziegler, *SRIM/TRIM*, <http://www.srim.org>, 2013.
- [10] J. F. Ziegler, J. P. Biersack and M. D. Ziegler, *The Stopping and Range of Ions in Solids*, Pergamon Press, New York, 2008.
- [11] W. F. Schmidt and E. Illenberger, *Nukleonika*, 2003, **48**, 75–82.

- [12] M. Vinodkumar, K. N. Joshipura, C. G. Limbachiya, and B. K. Antony, *Nucl. Instrum. Methods Phys. Res. B*, 2003, **212**, 63–66.
